# Supplementary material for: Silk Fibroin-Coated Nanoagents for Acidic Lysosome Targeting by a Functional Preservation Strategy in Cancer Chemotherapy
Source: PubMed Central journal article supplement — Theranostics. 2019 Jan 25;9(4):961–73. doi: 10.7150/thno.30765 (PMC6401409; doi:10.7150/thno.30765), 2019-01-25
Supplement: thnov09p0961s1.pdf [file thnov09p0961s1.pdf]

## Supplementary Tables and Figures

# **Silk fibroin-coated nanoagents for acidic lysosome targeting by a functional preservation strategy in cancer chemotherapy**

Mixiao Tan,<sup>1</sup> Weiwei Liu,<sup>1</sup> Fengqiu Liu,<sup>1</sup> Wei Zhang,<sup>1</sup> Hui Gao,<sup>1</sup> Juan Cheng,<sup>1</sup> Yu Chen,<sup>2</sup>  
Zhigang Wang,<sup>1</sup> Yang Cao<sup>1\*</sup> and Haitao Ran<sup>1\*</sup>

1. The Second Affiliated Hospital of Chongqing Medical University & Chongqing Key Laboratory of Ultrasound Molecular Imaging, Chongqing, 400010, China.
2. State Key Lab of High-Performance Ceramics and Superfine Microstructure, Shanghai Institute of Ceramics, Chinese Academy of Sciences, Shanghai, 200050, P. R. China.

Corresponding authors: [caoyangcqu@hospital.cqmu.edu.cn](mailto:caoyangcqu@hospital.cqmu.edu.cn) and [ranhaitao@hospital.cqmu.edu.cn](mailto:ranhaitao@hospital.cqmu.edu.cn)

| Time (h)      | DOX ( $\mu\text{g}$ ) |               | Dose %         | C. A. (%) |
|---------------|-----------------------|---------------|----------------|-----------|
|               | Mean                  | SD            |                |           |
| 0-6           | 4.901                 | 0.774         | 3.921%         | 3.921%    |
| 6-24          | 2.786                 | 1.681         | 2.229%         | 6.150%    |
| 24-36         | 1.579                 | 0.839         | 1.263%         | 7.413%    |
| 36-48         | 1.280                 | 0.555         | 1.024%         | 8.437%    |
| 48-72         | 1.028                 | 0.504         | 0.822%         | 9.259%    |
| 72-96         | 0.640                 | 0.614         | 0.512%         | 9.771%    |
| 96-120        | 0.511                 | 0.331         | 0.409%         | 10.180%   |
| 120-144       | 0.279                 | 0.123         | 0.223%         | 10.403%   |
| 144-168       | 0.249                 | 0.156         | 0.199%         | 10.602%   |
| <b>Sum</b>    | <b>13.253</b>         | <b>5.576</b>  | <b>10.602%</b> |           |
| <b>Dose %</b> | <b>10.602%</b>        | <b>4.462%</b> |                |           |

\*C. A. = Cumulative Amount

**Table S1.** Cumulative amount of DOX excreted in mice urine after a single intravenous injection of DOX (n=3).

| Time (h)      | DOX ( $\mu\text{g}$ ) |               | Dose %        | C. A. (%) |
|---------------|-----------------------|---------------|---------------|-----------|
|               | Mean                  | SD            |               |           |
| 0-6           | 0.044                 | 0.016         | 0.035%        | 0.035%    |
| 6-24          | 0.428                 | 0.350         | 0.342%        | 0.377%    |
| 24-36         | 0.999                 | 0.194         | 0.799%        | 1.176%    |
| 36-48         | 1.079                 | 0.592         | 0.863%        | 2.039%    |
| 48-72         | 1.519                 | 0.150         | 1.215%        | 3.254%    |
| 72-96         | 1.244                 | 0.121         | 0.995%        | 4.249%    |
| 96-120        | 1.092                 | 0.634         | 0.874%        | 5.123%    |
| 120-144       | 0.807                 | 0.156         | 0.646%        | 5.769%    |
| 144-168       | 0.751                 | 0.041         | 0.601%        | 6.370%    |
| <b>Sum</b>    | <b>7.963</b>          | <b>2.254</b>  | <b>6.370%</b> |           |
| <b>Dose %</b> | <b>6.370%</b>         | <b>1.803%</b> |               |           |

\*C. A. = Cumulative Amount

**Table S2.** Cumulative amount of DOX excreted in mice urine after a single intravenous injection of ACC-DOX NPs (n=3).

| Time (h) | DOX ( $\mu\text{g}$ ) |        | Dose % | C. A. (%) |
|----------|-----------------------|--------|--------|-----------|
|          | Mean                  | SD     |        |           |
| 0-6      | 0.035                 | 0.026  | 0.028% | 0.028%    |
| 6-24     | 0.296                 | 0.169  | 0.237% | 0.265%    |
| 24-36    | 0.539                 | 0.262  | 0.431% | 0.696%    |
| 36-48    | 0.658                 | 0.365  | 0.526% | 1.222%    |
| 48-72    | 1.053                 | 0.595  | 0.842% | 2.064%    |
| 72-96    | 0.569                 | 0.284  | 0.455% | 2.519%    |
| 96-120   | 0.523                 | 0.154  | 0.418% | 2.937%    |
| 120-144  | 0.345                 | 0.107  | 0.276% | 3.213%    |
| 144-168  | 0.376                 | 0.117  | 0.301% | 3.514%    |
| Sum      | 4.393                 | 2.080  | 3.514% |           |
| Dose %   | 3.514%                | 1.664% |        |           |

\*C. A. = Cumulative Amount

**Table S3.** Cumulative amount of DOX excreted in mice urine after a single intravenous injection of ACC-DOX-SF NPs (n=3).

| Time (h) | DOX ( $\mu\text{g}$ ) |        | Dose % | C. A. (%) |
|----------|-----------------------|--------|--------|-----------|
|          | Mean                  | SD     |        |           |
| 0-6      | 0.016                 | 0.013  | 0.013% | 0.013%    |
| 6-24     | 0.090                 | 0.088  | 0.072% | 0.085%    |
| 24-36    | 0.118                 | 0.025  | 0.094% | 0.179%    |
| 36-48    | 0.169                 | 0.024  | 0.135% | 0.314%    |
| 48-72    | 0.109                 | 0.016  | 0.087% | 0.401%    |
| 72-96    | 0.061                 | 0.023  | 0.049% | 0.450%    |
| 96-120   | 0.020                 | 0.008  | 0.016% | 0.466%    |
| 120-144  | 0.030                 | 0.008  | 0.024% | 0.490%    |
| 144-168  | 0.015                 | 0.009  | 0.012% | 0.502%    |
| Sum      | 0.628                 | 0.214  | 0.502% |           |
| Dose %   | 0.502%                | 0.171% |        |           |

\*C. A. = Cumulative Amount

**Table S4.** Cumulative amount of DOX excreted in mice faeces after a single intravenous injection of DOX (n=3).

| Time (h) | DOX ( $\mu\text{g}$ ) |        | Dose % | C. A. (%) |
|----------|-----------------------|--------|--------|-----------|
|          | Mean                  | SD     |        |           |
| 0-6      | 0.013                 | 0.006  | 0.010% | 0.010%    |
| 6-24     | 0.029                 | 0.016  | 0.023% | 0.033%    |
| 24-36    | 0.059                 | 0.053  | 0.047% | 0.080%    |
| 36-48    | 0.170                 | 0.071  | 0.136% | 0.216%    |
| 48-72    | 0.240                 | 0.077  | 0.192% | 0.408%    |
| 72-96    | 0.301                 | 0.226  | 0.241% | 0.649%    |
| 96-120   | 0.477                 | 0.127  | 0.382% | 1.031%    |
| 120-144  | 0.729                 | 0.037  | 0.583% | 1.614%    |
| 144-168  | 0.577                 | 0.332  | 0.462% | 2.076%    |
| Sum      | 2.595                 | 0.944  | 2.076% |           |
| Dose %   | 2.076%                | 0.755% |        |           |

\*C. A. = Cumulative Amount

**Table S5.** Cumulative amount of DOX excreted in mice faeces after a single intravenous injection of ACC-DOX NPs (n=3).

| Time (h) | DOX ( $\mu\text{g}$ ) |        | Dose % | C. A. (%) |
|----------|-----------------------|--------|--------|-----------|
|          | Mean                  | SD     |        |           |
| 0-6      | 0.009                 | 0.006  | 0.007% | 0.007%    |
| 6-24     | 0.014                 | 0.005  | 0.011% | 0.018%    |
| 24-36    | 0.021                 | 0.011  | 0.017% | 0.035%    |
| 36-48    | 0.015                 | 0.006  | 0.012% | 0.047%    |
| 48-72    | 0.048                 | 0.025  | 0.038% | 0.085%    |
| 72-96    | 0.074                 | 0.026  | 0.059% | 0.144%    |
| 96-120   | 0.245                 | 0.071  | 0.196% | 0.340%    |
| 120-144  | 0.251                 | 0.089  | 0.201% | 0.541%    |
| 144-168  | 0.261                 | 0.056  | 0.209% | 0.750%    |
| Sum      | 0.938                 | 0.295  | 0.750% |           |
| Dose %   | 0.750%                | 0.236% |        |           |

\*C. A. = Cumulative Amount

**Table S6.** Cumulative amount of DOX excreted in mice faeces after a single intravenous injection of ACC-DOX-SF NPs (n=3).

|                        | WBC (10 <sup>9</sup> /L) | LYMPH (%)          | MON (%)          | Gran (%)          | RBC (10 <sup>12</sup> /L) | HGB (g/l)            | MCV (fL)           | MCH (pg)           |
|------------------------|--------------------------|--------------------|------------------|-------------------|---------------------------|----------------------|--------------------|--------------------|
| <b>Reference Range</b> | <b>0.80~6.80</b>         | <b>55.80~90.60</b> | <b>1.80~6.00</b> | <b>8.60~38.90</b> | <b>6.36~9.42</b>          | <b>110.00~143.00</b> | <b>48.20~58.30</b> | <b>15.80~19.00</b> |
| <b>Blank Control</b>   | 4.27±0.46                | 78.84±8.79         | 6.33±0.95        | 25.83±3.68        | 9.87±0.85                 | 141.67±16.78         | 52.40±2.10         | 16.70±0.29         |
| <b>1 h</b>             | 4.21±1.01                | 78.20±0.64         | 4.07±0.66        | 18.03±1.14        | 9.14±0.84                 | 140.33±8.18          | 46.77±0.34         | 15.10±0.54         |
| <b>3 h</b>             | 4.23±0.74                | 57.97±0.54         | 5.70±0.51        | 33.80±2.95        | 10.55±0.31                | 141.67±1.25          | 44.33±1.44         | 15.10±0.33         |
| <b>6 h</b>             | 3.50±0.94                | 65.10±6.71         | 5.73±0.57        | 26.40±6.55        | 10.59±1.50                | 146.33±18.98         | 47.50±1.69         | 15.37±0.56         |
| <b>12 h</b>            | 4.93±0.94                | 71.30±5.66         | 5.43±0.25        | 20.97±6.78        | 10.56±0.26                | 142.67±3.09          | 46.23±0.90         | 15.40±0.22         |
| <b>24 h</b>            | 4.63±1.33                | 79.37±2.43         | 4.30±0.37        | 19.46±3.85        | 10.27±0.26                | 135.33±3.30          | 43.40±1.22         | 14.80±0.21         |
| <b>48 h</b>            | 4.97±1.86                | 82.57±1.75         | 3.43±0.12        | 15.63±3.03        | 9.52±0.30                 | 117.67±2.87          | 43.50±1.35         | 14.67±0.34         |
| <b>72 h</b>            | 5.20±0.24                | 82.40±0.80         | 3.23±0.12        | 16.03±2.67        | 9.07±1.36                 | 128.67±13.47         | 48.33±0.71         | 16.23±0.82         |

|                        | MCHC (g/l)           | HCT (%)            | PLT (10 <sup>9</sup> /L) | BUN (mg/dl)       | ALT (U/L)           | AST (U/L)           | ALP (U/L)            |
|------------------------|----------------------|--------------------|--------------------------|-------------------|---------------------|---------------------|----------------------|
| <b>Reference Range</b> | <b>302.00~353.00</b> | <b>34.60~44.60</b> | <b>450.00~1590.00</b>    | <b>7.00~31.00</b> | <b>40.00~170.00</b> | <b>67.00~381.00</b> | <b>108.00~367.00</b> |
| <b>Blank Control</b>   | 322.67±2.87          | 40.63±4.36         | 832.67±202.41            | 32.29±5.15        | 105.31±33.67        | 316.62±87.71        | 154.95±19.70         |
| <b>1 h</b>             | 325.67±9.74          | 40.77±4.78         | 685.67±121.25            | 19.85±3.80        | 81.85±23.94         | 212.10±16.32        | 180.48±20.66         |
| <b>3 h</b>             | 332.67±7.41          | 38.77±0.91         | 626.00±107.20            | 23.03±2.63        | 152.09±30.24        | 298.24±41.03        | 158.41±15.00         |
| <b>6 h</b>             | 320.67±1.70          | 40.20±5.64         | 838.00±85.02             | 30.74±8.87        | 93.56±14.88         | 219.99±67.26        | 165.23±22.83         |
| <b>12 h</b>            | 325.00±3.74          | 40.13±1.14         | 573.00±132.32            | 30.56±6.00        | 97.02±30.41         | 239.32±85.41        | 197.64±36.36         |
| <b>24 h</b>            | 339.33±8.50          | 37.00±1.82         | 738.33±47.68             | 28.27±3.97        | 118.63±31.37        | 178.87±15.92        | 174.55±17.93         |
| <b>48 h</b>            | 340.00±4.55          | 33.60±3.25         | 461.33±53.11             | 21.48±1.60        | 52.60±7.09          | 156.55±21.75        | 167.67±33.57         |
| <b>72 h</b>            | 335.67±12.76         | 35.67±5.61         | 788.33±84.42             | 27.52±5.69        | 116.32±58.85        | 273.50±12.05        | 142.66±20.08         |

**Table S7.** *In vivo* biosafety assay of the ACC-DOX-SF NPs. Healthy Balb/c mice sacrificed at 1 h, 3 h, 6 h, 12 h, 24 h, 48 h, 72 h after intravenous injection of the ACC-DOX-SF NPs.

Hematological analysis, liver and kidney function analysis were measured.

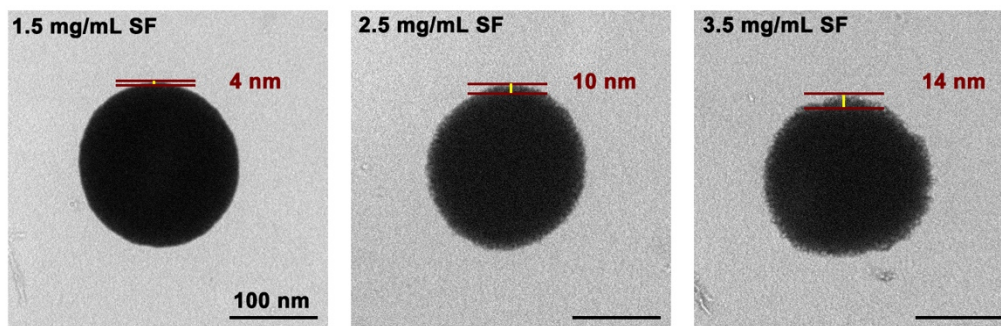

**Figure S1.** Representative TEM images of ACC-DOX-SF NPs with different amount of silk fibroin (1.5 mg/mL, 2.5 mg/mL and 3.5 mg/mL) at high magnification. The thickness of SF corona was measured as 4 nm, 10 nm and 14 nm, respectively.

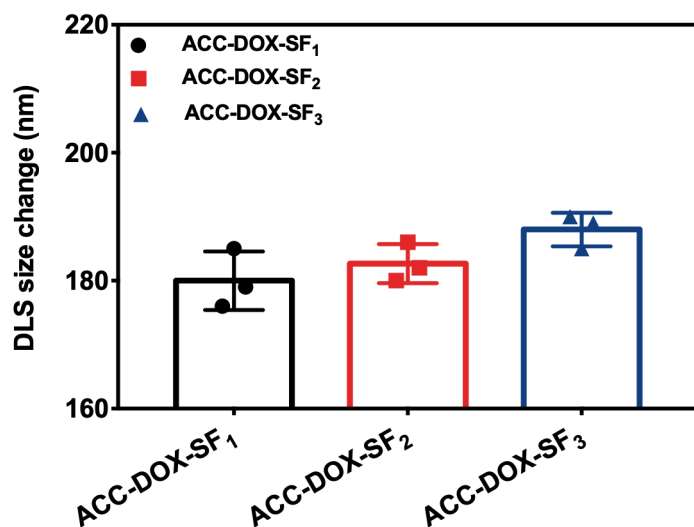

**Figure S2.** Size variation of ACC-DOX-SF NPs with different amount of silk fibroin. ACC-DOX-SF<sub>1</sub>, ACC-DOX-SF<sub>2</sub> and ACC-DOX-SF<sub>3</sub> represented the concentration of SF was 1.5 mg/mL, 2.5 mg/mL and 3.5 mg/mL, respectively.

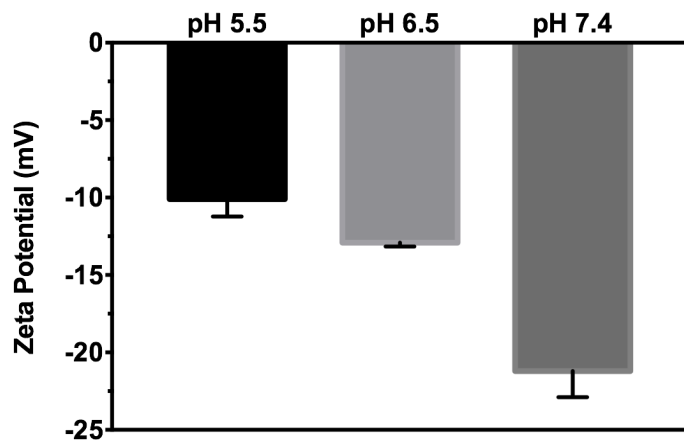

**Figure S3.** Zeta potential of NPs in acetate buffer solution with different pH values.

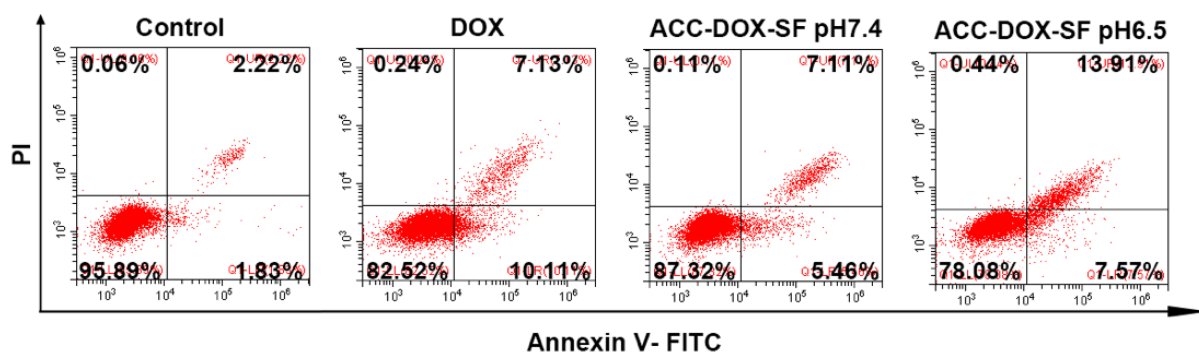

**Figure S4.** Flow cytometry measurement of 4T1 cell apoptosis induced by various treatments after 12 h of incubation.

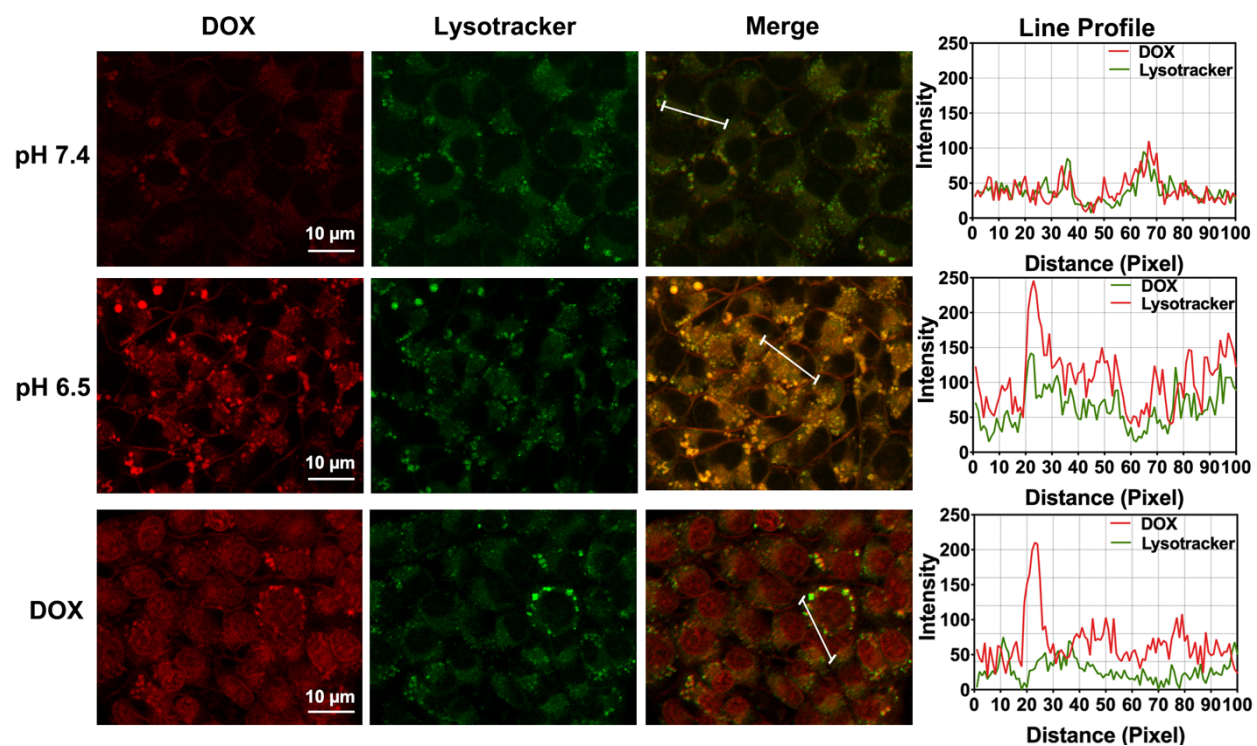

**Figure S5.** Lysosome colocalization performance of free DOX and ACC-DOX-SF NPs in 4T1 cells. Intensity line profiles of the region of interest (white line) across the 4T1 cells costained with NPs/free DOX and Lysotracker Green.

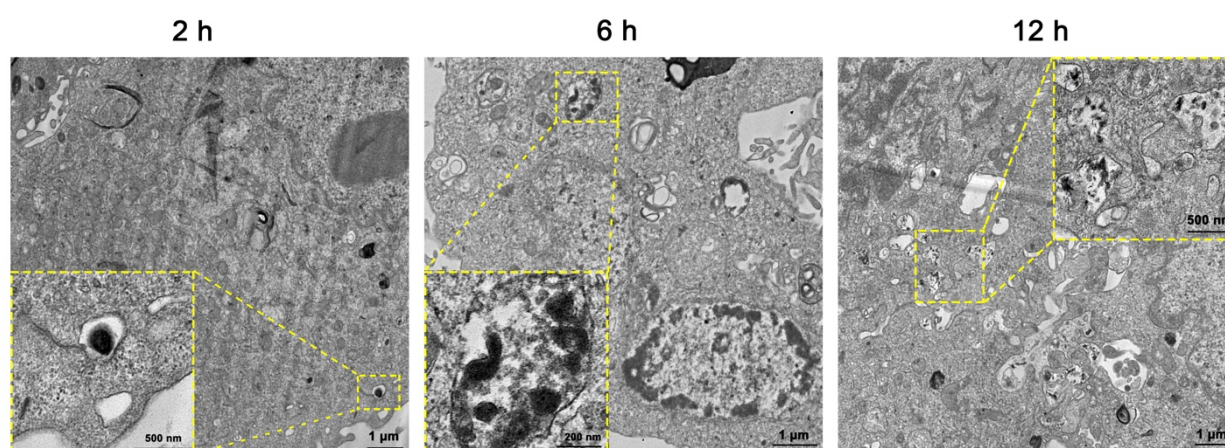

**Figure S6.** TEM of 4T1 cells incubated with ACC-DOX-SF NPs for 2 h, 6 h, 12 h. The lower left or top right was the magnified ROI area (yellow square in the image).



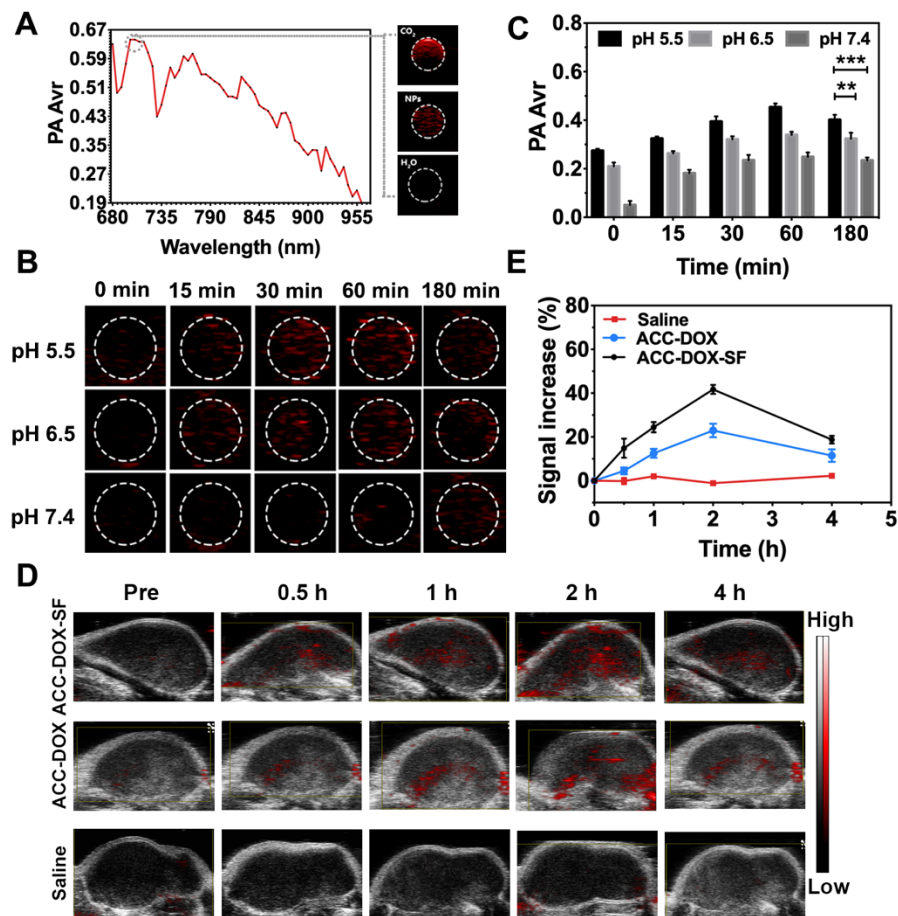

**Figure S7.** Optoacoustic imaging performance of ACC-SF@DOX NPs. (A) PA-signal changes of pure CO<sub>2</sub>, ACC-DOX-SF NPs and H<sub>2</sub>O upon irradiation by a laser over the wavelength range of 680-970 nm. The right-hand pictures of various substances were obtained at a wavelength of 700 nm. (B) PA imaging of the ACC-DOX-SF NPs *in vitro* at different pH values. (C) Quantification of the PA-signal intensities of the ACC-DOX-SF NPs at different pH values. (D) PA images and (E) signal increases (%) in the 4T1 tumors with different treatments after 0.5 h, 1 h, 2 h, and 4 h. The results are expressed as the mean  $\pm$  standard deviation (SD), \*P < 0.05, \*\*P < 0.01, or \*\*\*P < 0.001.

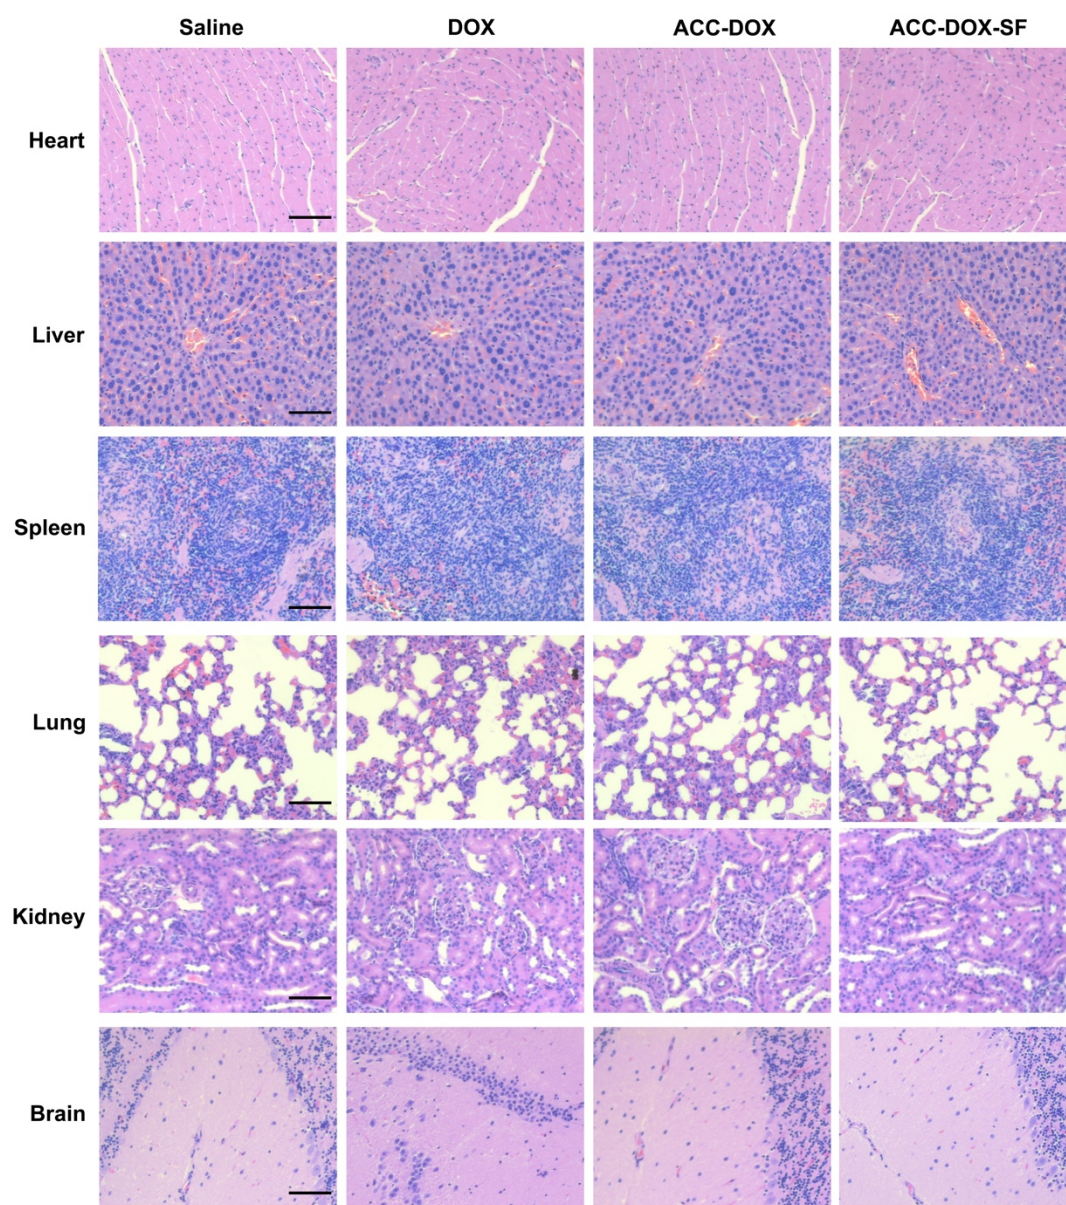

**Figure S8.** Histological observation of H&E-stained tissue sections of major organs (heart, liver, spleen, lung, kidney and brain) after treatments with saline, free DOX or ACC-DOX-SF NPs at day 21. The scale bars are 50  $\mu$ m.

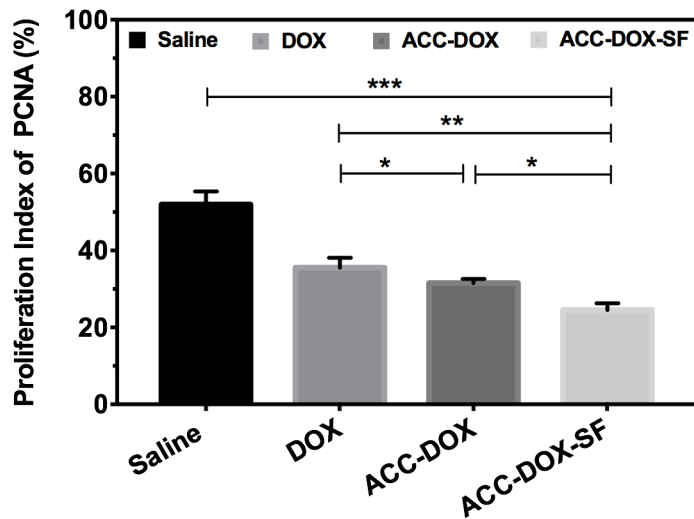

**Figure S9.** The proliferation index (PI) of PCNA in each group. The results are expressed as the mean  $\pm$  SD (n = 5, \*P < 0.05, \*\*P < 0.01, or \*\*\*P < 0.001).

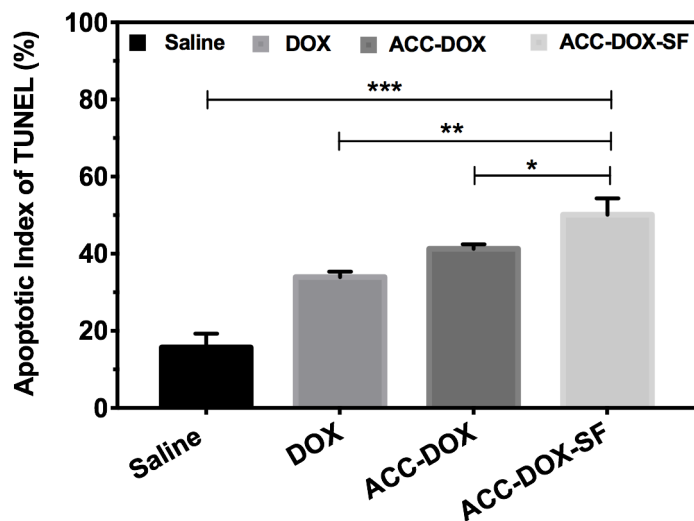

**Figure S10.** The apoptotic index (AI) of TUNEL in each group. The results are expressed as the mean  $\pm$  SD (n = 5, \*P < 0.05, \*\*P < 0.01, or \*\*\*P < 0.001).

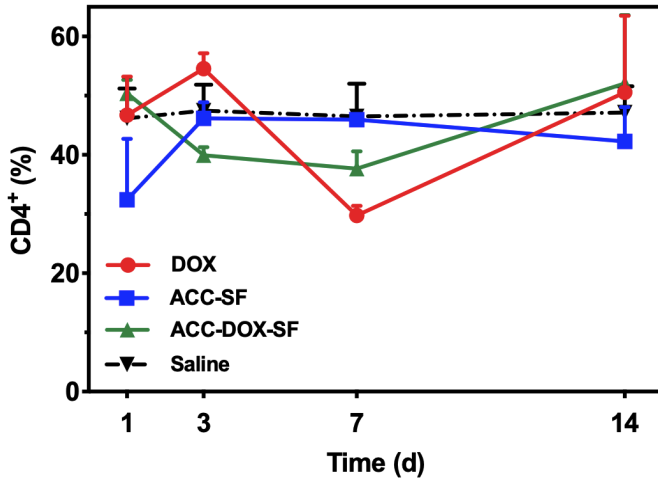

**Figure S11.** Changes of CD4<sup>+</sup> T cells subsets after intravenous injection with ACC-DOX-SF NPs, ACC-SF NPs, DOX or saline for 1, 3, 7 and 14 days. The results were expressed as the mean  $\pm$  SD (n = 3, \*P < 0.05).

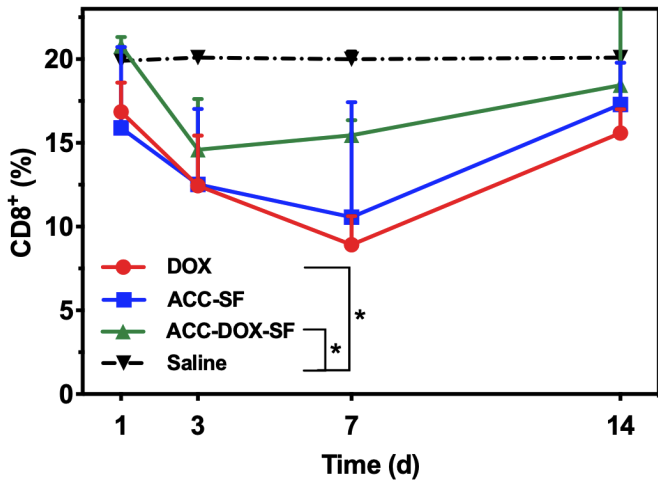

**Figure S12.** Changes of CD8<sup>+</sup> T cells subsets after intravenous injection with ACC-DOX-SF NPs, ACC-SF NPs, DOX or saline for 1, 3, 7 and 14 days. The results were expressed as the mean  $\pm$  SD (n = 3, \*P < 0.05).

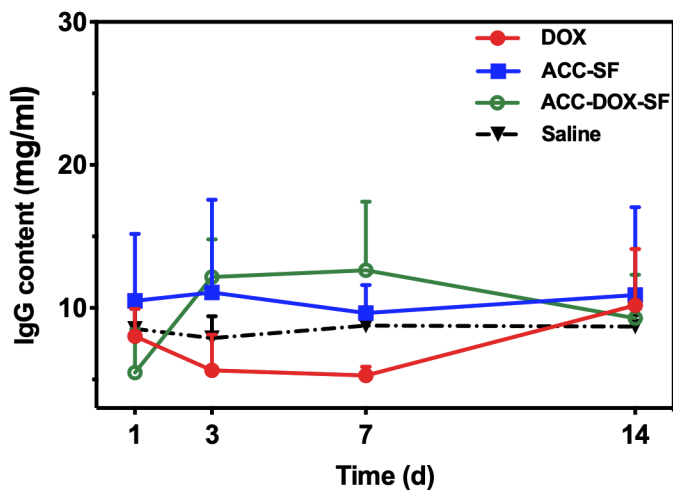

**Figure S13.** Changes of immunoglobulin G (IgG) levels after treated with ACC-DOX-SF NPs, ACC-DOX NPs, DOX or saline for 1, 3, 7, 14 days. The results were expressed as the mean $\pm$  SD (n = 3, \*P < 0.05).

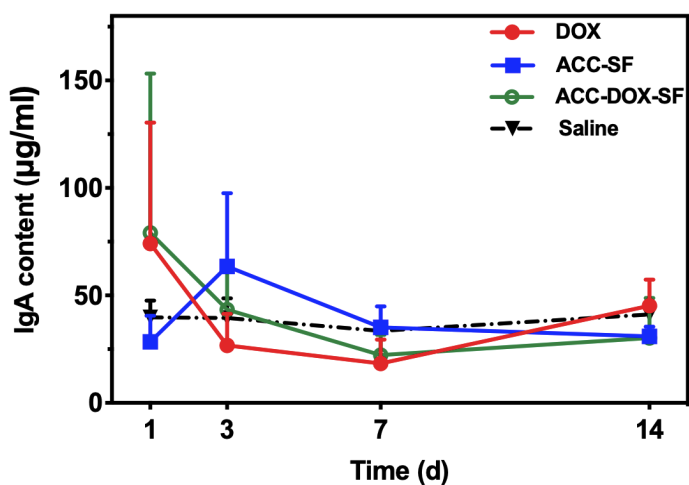

**Figure S14.** Changes of immunoglobulin A (IgA) levels after treated with ACC-DOX-SF NPs, ACC-DOX NPs, DOX or saline for 1, 3, 7, 14 days. The results were expressed as the mean $\pm$  SD (n = 3, \*P < 0.05).

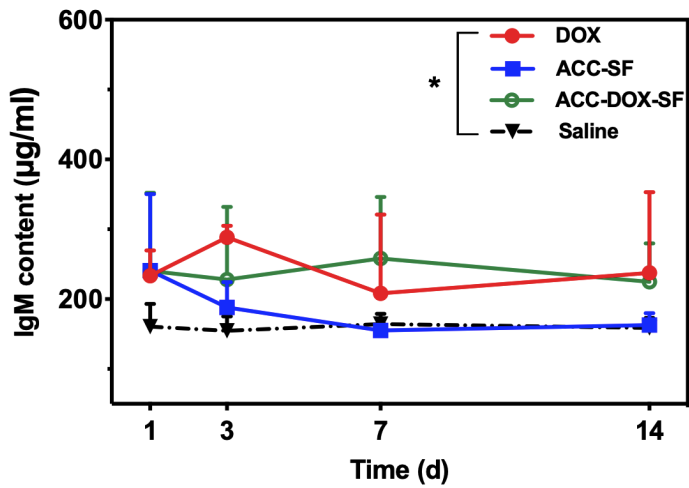

**Figure S15.** Changes of immunoglobulin M (IgM) levels after treated with ACC-DOX-SF NPs, ACC-DOX NPs, DOX or saline for 1, 3, 7, 14 days. The results were expressed as the mean $\pm$  SD (n = 3, \*P < 0.05).
